# Supplementary material
Source: Springer Nature journal article supplement (https://www.springermedizin.de/resource/supplementary/13051_2011_229_MOESM1_ESM.pdf/9670216)

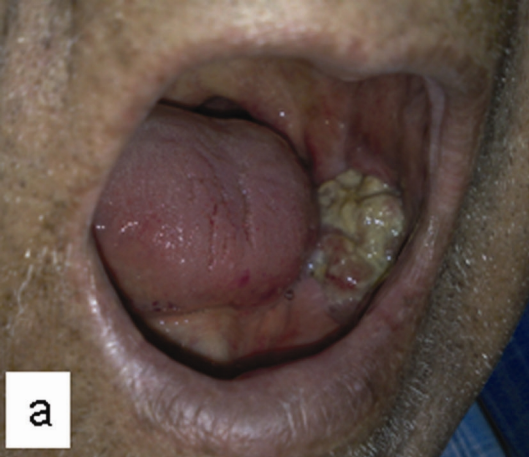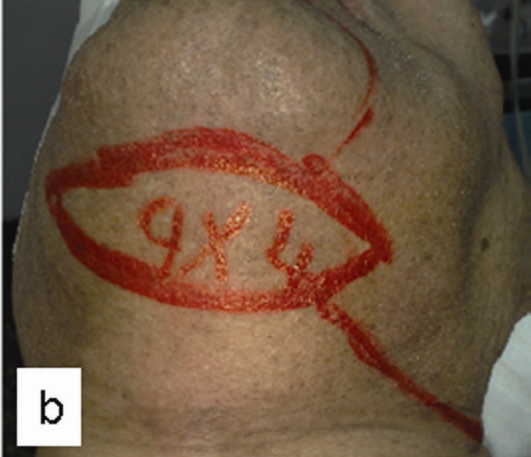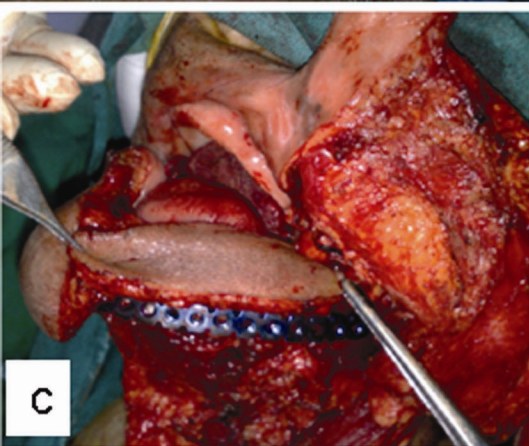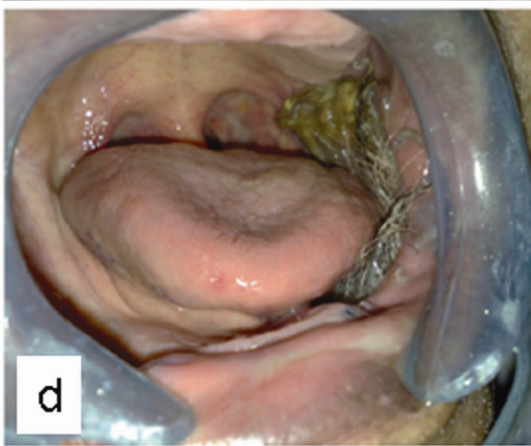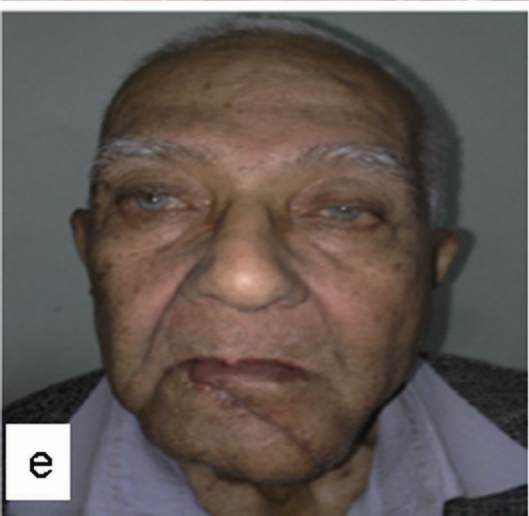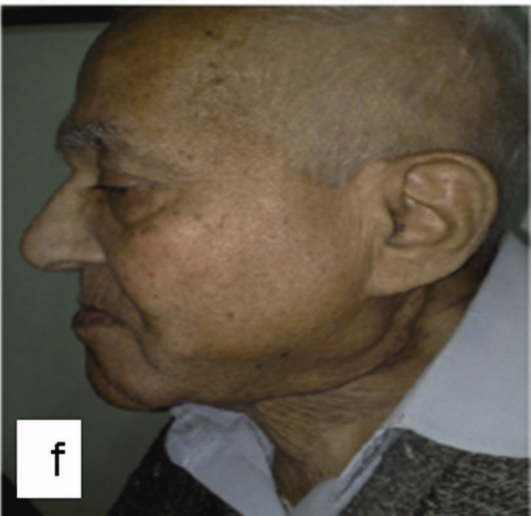

Supplement: MOESM1 [file 9670216]
